# Supplementary material
Source: MDPI journal article supplement (https://www.mdpi.com/2073-4395/14/1/114)
Supplement: s1 [file s1]

## Supplementary material

**Supplementary Figure S1:** Photos of field trials (A) to test the effect of wood vinegar delivered from 50 ml plastic tubes fixed under tree canopy (B, arrows) to evaluate the repellent effect towards *B. oleae* in olive groves in Cicerale (Southern Italy).

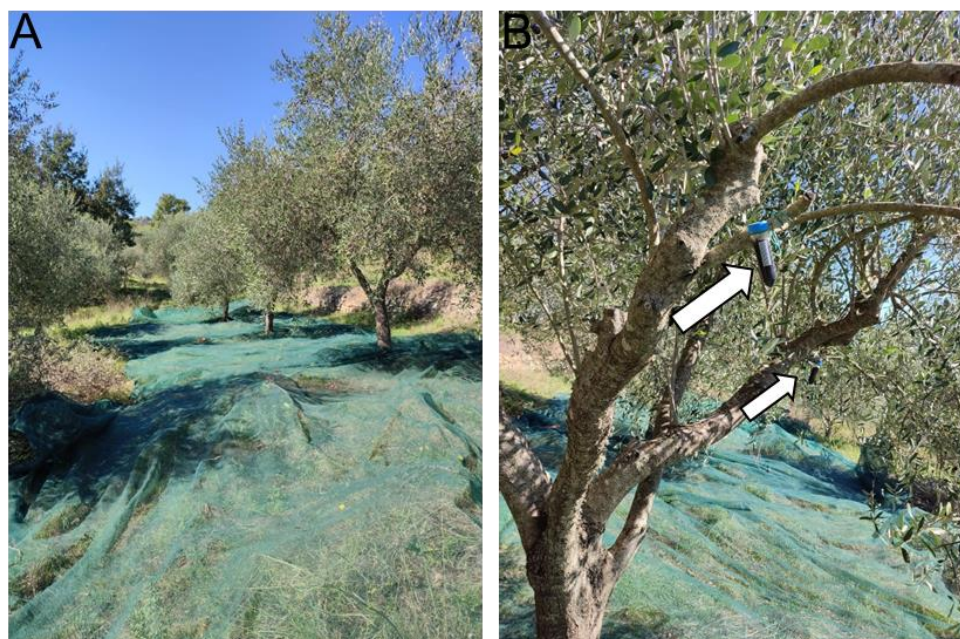

**Table S1:** Summary of the Generalized Linear Modelling (GLM) testing (significant values in bold at  $P < 0.05$ ) for main effects of wood vinegar treatments on *Bactrocera oleae*.

|           | Degree of freedom | Sum Squares | Mean Squares | F-value | P-value        |
|-----------|-------------------|-------------|--------------|---------|----------------|
| Treatment | 3                 | 4194        | 1397.9       | 13.79   | <b>0.00158</b> |
| Residuals | 8                 | 811         | 101.3        |         |                |

**Table S2:** Summary of the Generalized Linear Modelling (GLM) testing (significant values in bold at  $P < 0.05$ ) for main and interactive effects of plant species and tested concentrations.

|                               | Degree of freedom | Sum Squares | Mean Squares | F-value | P-value           |
|-------------------------------|-------------------|-------------|--------------|---------|-------------------|
| Plant species                 | 5                 | 83643       | 16729        | 33.772  | <b>&lt; 0.001</b> |
| Concentration                 | 5                 | 76858       | 15372        | 31.032  | <b>&lt; 0.001</b> |
| Plant species * Concentration | 25                | 63694       | 2548         | 5.143   | <b>&lt; 0.001</b> |
| Residuals                     | 684               | 338818      | 495          |         |                   |
